# Supplementary material for: Isodon rugosus (Wall. ex Benth.) Codd In Vitro Cultures: Establishment, Phytochemical Characterization and In Vitro Antioxidant and Anti-Aging Activities
Source: PubMed Central journal article supplement (PMC6358864; doi:10.3390/ijms20020452), 2019-01-21
Supplement: ijms-20-00452-s001.pdf [file ijms-20-00452-s001.pdf]

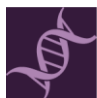

1 Article

2 **Efficient production of industrially attractive**  
3 **metabolites from *in vitro* cultures of *Isodon rugosus***  
4 **(Wall. ex Benth.) Codd**

5 **Bilal Haider Abbasi<sup>1,2,3,6,\*</sup>, Aisha Siddiquah<sup>1,ψ</sup>, Duangjai Tungmunnithum<sup>2,3,4,ψ</sup>, Shankhamala**  
6 **Bose<sup>6</sup>, Muhammad Younas<sup>1</sup>, Laurine Garros<sup>2,3,5</sup>, Samantha Drouet<sup>2,3</sup>, Nathalie Giglioli-Guivarc'h<sup>6</sup>,**  
7 **Christophe Hano<sup>2,3,\*</sup>,ψ**

8 <sup>1</sup> Department of Biotechnology, Quaid-i-Azam University, Islamabad-45320, Pakistan

9 <sup>2</sup> Laboratoire de Biologie des Ligneux et des Grandes Cultures (LBLGC EA1207), INRA USC1328, Plant Lignans  
10 Team, Université d'Orléans, 45067 Orléans CÉDEX 2, France

11 <sup>3</sup> Bioactifs et Cosmétiques, GDR 3711 COSM'ACTIFS, CNRS, 45067 Orléans CÉDEX 2, France

12 <sup>4</sup> Department of Pharmaceutical Botany, Faculty of Pharmacy, Mahidol University, 447 Sri-Ayuthaya Road,  
13 Rajathevi, Bangkok 10400, Thailand

14 <sup>5</sup> Institut de Chimie Organique et Analytique, ICOA UMR7311, Université d'Orléans-CNRS, 45067 Orléans  
15 CÉDEX 2, France

16 <sup>6</sup> EA2106 Biomolécules et Biotechnologies Végétales, Université de Tours, 37200 Tours, France

17 \* Correspondence: BHA; bhabbasi@qau.edu.pk; CH; christophe.hano@univ-orleans.fr

18 ψ These authors contributed equally to this work.

19

20

21

22

22 **Supplementary Materials:**

23

24

24 **Table S1:** Culture conditions and explant origin of the 12 *I. rugosus* callus used for the determination  
25 of main phytochemicals, antioxidant and anti-aging activities

26

27

27 **Table S2:** Pearson coefficient correlation linking the main phytochemicals accumulated in *I. rugosus*  
28 callus extracts

29

30

30 **Figure S1:** Comparison of DPPH antioxidant activity of extracts at different PGRs from stem-derived  
31 callus culture (A) or leaf-derived callus culture (B).

32

33 **Table S1.**

34 Culture conditions and explant origin of the 12 *I. rugosus* callus used for the determination of main  
35 phytochemicals, antioxidant and anti-aging activities.  
36

| Sample | PGRs (mg/l)           | Initial explant |
|--------|-----------------------|-----------------|
| Ir#1   | TDZ (1.0)             | Stem            |
| Ir#2   | TDZ (1.0)             | Leaf            |
| Ir#3   | TDZ (2.0)             | Stem            |
| Ir#4   | TDZ (2.0)             | Leaf            |
| Ir#5   | TDZ (3.0)             | Stem            |
| Ir#6   | TDZ (3.0)             | Leaf            |
| Ir#7   | TDZ (1.0) + NAA (1.0) | Stem            |
| Ir#8   | TDZ (1.0) + NAA (1.0) | Leaf            |
| Ir#9   | TDZ (1.0) + NAA (2.0) | Stem            |
| Ir#10  | TDZ (1.0) + NAA (2.0) | Leaf            |
| Ir#11  | TDZ (1.0) + NAA (3.0) | Stem            |
| Ir#12  | TDZ (1.0) + NAA (3.0) | Leaf            |

37

38

39 **Table S2.**

40

41

42

Pearson coefficient correlation linking the main phytochemicals accumulated in *I. rugosus* callus extracts.

|    | CA     | RA    | BA      | OA      | PA |
|----|--------|-------|---------|---------|----|
| CA |        |       |         |         |    |
| RA | 0.506  |       |         |         |    |
| BA | -0.064 | 0.491 |         |         |    |
| OA | 0.137  | 0.467 | 0.830** |         |    |
| PA | 0.263  | 0.525 | 0.520   | 0.718** |    |

43

44

\*  $p < 0.05$ , \*\*  $p < 0.01$ , \*\*\*  $p < 0.001$

45  
46 **Figure S1**

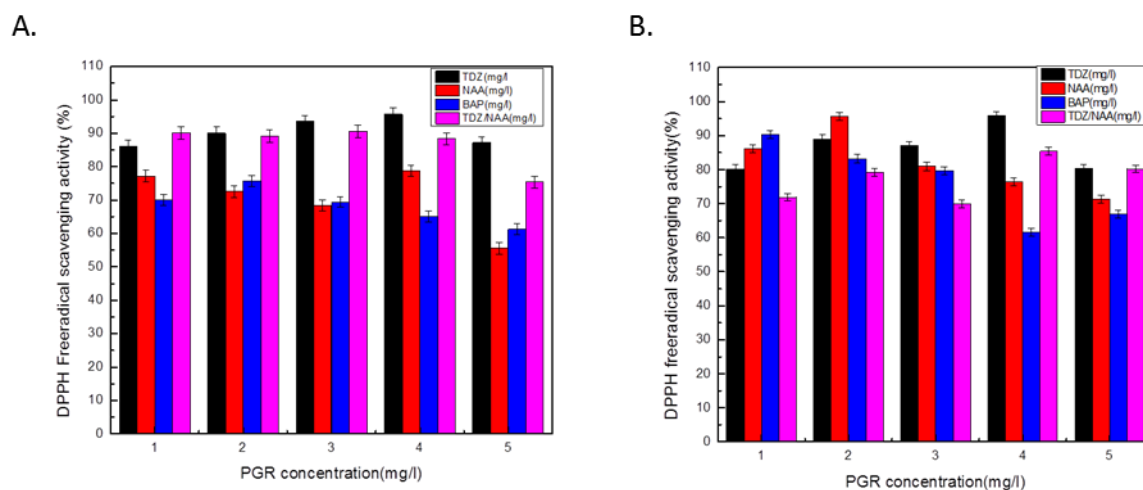

47  
48 **Figure S1:** Comparison of DPPH antioxidant activity of extracts at different PGRs from stem-derived callus  
49 culture (A) or leaf-derived callus culture (B).

50  
51

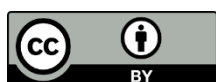

© 2019 by the authors. Submitted for possible open access publication under the terms and conditions of the Creative Commons Attribution (CC BY) license (<http://creativecommons.org/licenses/by/4.0/>).

52
